# Supplementary material for: Efficacy of topical corticosteroids and non-steroidal anti-inflammatory drugs for the treatment of diabetic macular oedema not in the context of intra-ocular surgery: a systematic review
Source: Research Square preprint supplement (doi:10.21203/rs.3.rs-5631827/v1), 2024-12-24
Supplement: Supplementary file 1 [file 0dc35556d5a4ce8840af5028.docx]

**APPENDIX - SEARCH STRATEGIES**

**Ovid MEDLINE ALL(R) 1946 to October 11, 2024**

Date Run: 11/10/2024

Filters: Publication date 2015-2024

Filtered results: 53

Remarks: Includes “Cochrane Highly Sensitive Search Strategy for identifying randomized trials in MEDLINE: sensitivity- and precision-maximizing version (2008 revision)”, with ‘randomized’ replaced by ‘randomi#ed’ to allow for spelling variation. 44

**Search history:**

1. (diabetic retinopathy or diabetic macular edema or diabetic macular oedema or diabetic cystoid macular edema or diabetic macular cystoid oedema or clinically significant macular edema or clinically significant macular oedema or DMO or DME or CMO or CME or CSM?).mp.
2. (steroid or corticosteroid or dexamethasone or prednisolone or loteprednol or difluprednate or rimexolone).mp.
3. exp Anti-Inflammatory Agents, Non-Steroidal/
4. (nsaid or non-steroidal or nonsteroidal or diclofen#c or bromfen#c or nepafen#c or ketor#lac).mp.
5. administration, topical/ or administration, ophthalmic/
6. (topical or drop* or eyedrop*).mp.
7. 2 or 3 or 4
8. 5 or 6
9. 7 and 8
10. 1 and 9
11. randomi#ed controlled trial.pt.
12. controlled clinical trial.pt.
13. randomi#ed.ab.
14. placebo.ab.
15. clinical trials as topic.sh.
16. randomly.ab.
17. trial.ti.
18. 11 or 12 or 13 or 14 or 15 or 16 or 17
19. exp animals/ not humans.sh.
20. 18 not 19
21. 10 and 20

**Ovid Embase 1996 to 2024 October 11**

Date Run: 11/10/2024

Filters: Publication date 2015-2024

Filtered results: 230

Remarks: RCT filter developed by the Canadian Agency for Drugs and Technologies in Health, as the one recommended by the Cochrane Handbook is for Embase.com not Ovid. 44,45

**Search history:**

1. (Randomized Controlled Trial or Controlled Clinical Trial or Pragmatic Clinical Trial or Equivalence Trial or Clinical Trial, Phase III).pt.
2. Randomized Controlled Trial/
3. exp Randomized Controlled Trials as Topic/
4. "Randomized Controlled Trial (topic)"/
5. Controlled Clinical Trial/
6. exp Controlled Clinical Trials as Topic/
7. "Controlled Clinical Trial (topic)"/
8. Randomization/
9. Random Allocation/
10. Double-Blind Method/
11. Double Blind Procedure/
12. Double-Blind Studies/
13. Single-Blind Method/
14. Single Blind Procedure/
15. Single-Blind Studies/
16. Placebos/
17. Placebo/
18. Control Groups/
19. Control Group/
20. (random* or sham or placebo*).ti,ab,hw,kf.
21. ((singl* or doubl*) adj (blind* or dumm* or mask*)).ti,ab,hw,kf.
22. ((tripl* or trebl*) adj (blind* or dumm* or mask*)).ti,ab,hw,kf.
23. (control* adj3 (study or studies or trial* or group*)).ti,ab,kf.
24. (Nonrandom* or non random* or non-random* or quasi-random* or quasirandom*).ti,ab,hw,kf.
25. allocated.ti,ab,hw.
26. ((open label or open-label) adj5 (study or studies or trial*)).ti,ab,hw,kf.
27. ((equivalence or superiority or non-inferiority or noninferiority) adj3 (study or studies or trial*)).ti,ab,hw,kf.
28. (pragmatic study or pragmatic studies).ti,ab,hw,kf.
29. ((pragmatic or practical) adj3 trial*).ti,ab,hw,kf.
30. ((quasiexperimental or quasi-experimental) adj3 (study or studies or trial*)).ti,ab,hw,kf.
31. (phase adj3 (III or "3") adj3 (study or studies or trial*)).ti,hw,kf.
32. or/1-31
33. (diabetic retinopathy or diabetic macular edema or diabetic macular oedema or diabetic cystoid macular edema or diabetic macular cystoid oedema or clinically significant macular edema or clinically significant macular oedema or DMO or DME or CMO or CME or CSM?).mp.
34. (steroid or corticosteroid or dexamethasone or prednisolone or loteprednol or difluprednate or rimexolone).mp.
35. nonsteroid antiinflammatory agent/
36. (nsaid or non-steroidal or nonsteroidal or diclofen#c or bromfen#c or nepafen#c or ketor#lac).mp.
37. exp topical treatment/ or exp topical drug administration/
38. (topical or drop* or eyedrop*).mp.
39. or/34-36
40. or/37-38
41. 39 and 40
42. 33 and 41
43. 32 and 42

**PubMed**

Date Run: 11/10/2024

Filters: Publication date 01/09/2022-11/10/2024 to capture results possibly not indexed on Medline and Embase 46

Filtered results: 67

Remarks: Search terms limited to DMO and mode of administration since resulting number of results low, thus allowing quick manual filtering.

**Query:**

**((diabetic retinopathy) OR (diabetic macular edema) or (diabetic macular oedema) or (diabetic cystoid macular edema) or (diabetic macular cystoid oedema) or (clinically significant macular edema) or (clinically significant macular oedema) OR (DMO) OR (DME) OR (CSMO) OR (CSME) OR (CMO) OR (CME)) AND ((topical) OR (drop))**

- PubMed automatic interpretation of search string:

(("diabetic retinopathy"[MeSH Terms] OR ("diabetic"[All Fields] AND "retinopathy"[All Fields]) OR "diabetic retinopathy"[All Fields] OR (("diabete"[All Fields] OR "diabetes mellitus"[MeSH Terms] OR ("diabetes"[All Fields] AND "mellitus"[All Fields]) OR "diabetes mellitus"[All Fields] OR "diabetes"[All Fields] OR "diabetes insipidus"[MeSH Terms] OR ("diabetes"[All Fields] AND "insipidus"[All Fields]) OR "diabetes insipidus"[All Fields] OR "diabetic"[All Fields] OR "diabetics"[All Fields] OR "diabets"[All Fields]) AND ("macular edema"[MeSH Terms] OR ("macular"[All Fields] AND "edema"[All Fields]) OR "macular edema"[All Fields])) OR (("diabete"[All Fields] OR "diabetes mellitus"[MeSH Terms] OR ("diabetes"[All Fields] AND "mellitus"[All Fields]) OR "diabetes mellitus"[All Fields] OR "diabetes"[All Fields] OR "diabetes insipidus"[MeSH Terms] OR ("diabetes"[All Fields] AND "insipidus"[All Fields]) OR "diabetes insipidus"[All Fields] OR "diabetic"[All Fields] OR "diabetics"[All Fields] OR "diabets"[All Fields]) AND ("macular edema"[MeSH Terms] OR ("macular"[All Fields] AND "edema"[All Fields]) OR "macular edema"[All Fields] OR ("macular"[All Fields] AND "oedema"[All Fields]) OR "macular oedema"[All Fields])) OR (("diabete"[All Fields] OR "diabetes mellitus"[MeSH Terms] OR ("diabetes"[All Fields] AND "mellitus"[All Fields]) OR "diabetes mellitus"[All Fields] OR "diabetes"[All Fields] OR "diabetes insipidus"[MeSH Terms] OR ("diabetes"[All Fields] AND "insipidus"[All Fields]) OR "diabetes insipidus"[All Fields] OR "diabetic"[All Fields] OR "diabetics"[All Fields] OR "diabets"[All Fields]) AND ("cystoid macular oedema"[All Fields] OR "macular edema"[MeSH Terms] OR ("macular"[All Fields] AND "edema"[All Fields]) OR "macular edema"[All Fields] OR ("cystoid"[All Fields] AND "macular"[All Fields] AND "edema"[All Fields]) OR "cystoid macular edema"[All Fields])) OR (("diabete"[All Fields] OR "diabetes mellitus"[MeSH Terms] OR ("diabetes"[All Fields] AND "mellitus"[All Fields]) OR "diabetes mellitus"[All Fields] OR "diabetes"[All Fields] OR "diabetes insipidus"[MeSH Terms] OR ("diabetes"[All Fields] AND "insipidus"[All Fields]) OR "diabetes insipidus"[All Fields] OR "diabetic"[All Fields] OR "diabetics"[All Fields] OR "diabets"[All Fields]) AND "macular"[All Fields] AND ("cystoid"[All Fields] OR "cystoids"[All Fields]) AND ("edema"[MeSH Terms] OR "edema"[All Fields] OR "edemas"[All Fields] OR "oedemas"[All Fields] OR "oedema"[All Fields])) OR (("ambulatory care facilities"[MeSH Terms] OR ("ambulatory"[All Fields] AND "care"[All Fields] AND "facilities"[All Fields]) OR "ambulatory care facilities"[All Fields] OR "clinic"[All Fields] OR "clinic s"[All Fields] OR "clinical"[All Fields] OR "clinically"[All Fields] OR "clinicals"[All Fields] OR "clinics"[All Fields]) AND ("significance"[All Fields] OR "significances"[All Fields] OR "significant"[All Fields] OR "significants"[All Fields]) AND ("macular edema"[MeSH Terms] OR ("macular"[All Fields] AND "edema"[All Fields]) OR "macular edema"[All Fields])) OR (("ambulatory care facilities"[MeSH Terms] OR ("ambulatory"[All Fields] AND "care"[All Fields] AND "facilities"[All Fields]) OR "ambulatory care facilities"[All Fields] OR "clinic"[All Fields] OR "clinic s"[All Fields] OR "clinical"[All Fields] OR "clinically"[All Fields] OR "clinicals"[All Fields] OR "clinics"[All Fields]) AND ("significance"[All Fields] OR "significances"[All Fields] OR "significant"[All Fields] OR "significants"[All Fields]) AND ("macular edema"[MeSH Terms] OR ("macular"[All Fields] AND "edema"[All Fields]) OR "macular edema"[All Fields] OR ("macular"[All Fields] AND "oedema"[All Fields]) OR "macular oedema"[All Fields])) OR "DMO"[All Fields] OR "DME"[All Fields] OR "CSMO"[All Fields] OR "CSME"[All Fields] OR "CMO"[All Fields] OR ("cme berl"[Journal] OR "cme"[All Fields])) AND ("topical"[All Fields] OR "topically"[All Fields] OR "topicals"[All Fields] OR "drop"[All Fields])) AND (2022/8/1:2023/2/28[pdat])

**Scopus**

Date Run: 11/10/2024

Filters: Publication year 2015-2024, Document types - Article or Conference paper, Source type - Journal

Filtered results: 219

Query string:

TITLE-ABS-KEY ( ( {diabetic retinopathy}7 OR {diabetic macular edema} OR {diabetic macular oedema} OR {diabetic cystoid macular edema} OR {diabetic macular cystoid oedema} OR {clinically significant macular edema} OR {clinically significant macular oedema} OR dmo OR dme OR csm* OR cmo OR cme ) AND ( ( steroid OR corticosteroid OR dexamethasone OR prednisolone OR loteprednol OR difluprednate OR rimexolone ) OR ( {anti-inflammatory} OR antiinflammatory OR {non-steroidal} OR nonsteroidal OR nsaid OR diclofen?c OR bromfen?c OR nepafen?c OR ketor?lac ) ) ) AND ( topical OR drop OR drops OR eyedrop* ) AND ( {macular thickness} OR {retinal thickness} OR {retinal volume} OR {retinal thickness} ) AND PUBYEAR > 2014 AND PUBYEAR < 2024 AND ( LIMIT-TO ( DOCTYPE,"ar" ) OR LIMIT-TO ( DOCTYPE,"cp" ) ) AND ( LIMIT-TO ( SRCTYPE,"j" ) )

**Web of Science Core Collection**

Date Run: 11/10/2024

Filters: Publication year 2015-2024, Document types - Article or Proceeding paper

Filtered results: 68

Query:

(((TS=(diabetic retinopathy OR diabetic macular edema OR diabetic cystoid macular edema OR clinically significant macular edema OR DMO OR DME OR CMO OR CME OR CSM?)) AND TS=(steroid OR corticosteroid OR dexamethasone OR prednisolone OR loteprednol OR difluprednate OR rimexolone OR nsaid OR antiinflammatory OR anti-inflammatory OR non-steroidal OR nonsteroidal OR diclofen?c OR bromfen?c OR nepafen?c OR ketor?lac)) AND TS=(topical or drop* or eyedrop*)) AND TS=(randomised controlled trial OR controlled clinical trial OR randomised OR placebo OR clinical trials OR randomly)

**CENTRAL**

Date Run: 11/10/2024

Filters: Publication year 2015-2024, Trials

Filtered results: 154

Search history (number of hits in brackets):

1. MeSH descriptor: [Macular Edema] explode all trees (1383)
2. diabetic retinopathy OR diabetic macular ?edema OR diabetic cystoid macular ?edema or clinically significant macular ?edema or DMO or DME or CMO or CME or CSM? (9024)
3. MeSH descriptor: [Steroids] explode all trees (67903)
4. MeSH descriptor: [Anti-Inflammatory Agents, Non-Steroidal] explode all trees (8734)
5. MeSH descriptor: [Anti-Inflammatory Agents] explode all trees (15221)
6. steroid OR corticosteroid OR dexamethasone OR prednisolone OR loteprednol OR difluprednate OR rimexolone (48973)
7. nsaid OR non-steroidal OR nonsteroidal OR diclofen?c OR bromfen?c OR nepafen?c OR ketor?lac (22838)
8. #1 OR #2 (9386)
9. #3 OR #4 OR #5 OR #6 OR #7 (123975)
10. topical OR drop* OR eyedrop* (77770)
11. MeSH descriptor: [Ophthalmic Solutions] explode all trees (3909)
12. MeSH descriptor: [Administration, Ophthalmic] explode all trees (159)
13. #10 OR #11 OR #12 (78984)
14. #9 AND #13 (11727)
15. #8 AND #14 (561)

**Authors and researchers contacted:**

- Akpolat C - no reply to request for macular volume data 23
- Boyer DS, Khanani A – The DIAMOND (DIAbetic Macular oedema patients ON a Drop) phase 3 double-masked, multicentre RCT for OCS-01 (dexamethasone 1.5% with enhanced solubility) vs vehicle is ongoing 37. Preliminary data were disseminated via a press release on 22/05/2023. Drops were applied six times a day for the first six weeks, then tds. After three months out of the planned 12 months of follow-up, the [mean] reduction in central subfield thickness was 61.6µm in the treatment arm (n=100) and 16µm in controls (n=48; *p*=0.004). Visual acuity gains were also significantly better with OCS-01.
- Embong Z – email address failing to deliver message; no reply two collaborators in other papers 47
- Gabr AF – investigators and patients were masked; confirmed no attrition; 25
- Ghalwash DA – no reply to request for macular volume data 22
- Haryanto S – no reply 48
- Jafari AM, Panahibazaz M – no reply 49
- Joshi M – email address not available; no reply from editor of meeting in which results were presented 50
- Khah ZR – email address not available; no reply from affiliated institution 51
- Kumar Deb A – no reply 52
- Rahmani K, Kamali G – failed to recruit 53
- Rezaei R, Anoushirvani AA – no reply 54
- Sahoo S – no reply 15
- Santos A – an ongoing RCT utilizing topical triamcinolone liposomal formulation planned to be published in 2024 (Personal communication, 22/03/2023)
- Tobimatsu Y – asked if data on anti-VEGF control is available, but no reply 27
